# Supplementary material
Source: HighWire-hosted journal article supplement (https://gut.bmj.com/content/67/12/2107)
Supplement: inline-supplementary-material-2 [file inline-supplementary-material-2.pdf]

|                                                       | IBS-C         | IBS-D          | IBS-M          | p-value |
|-------------------------------------------------------|---------------|----------------|----------------|---------|
| N                                                     | 13            | 15             | 18             |         |
| Difference IBS-SSS after 3 months for all (mean (sd)) | 108 (87.87)   | 105.4 (106.43) | 65.89 (103.61) | 0.413   |
| FMT-group                                             | 42.2 (40.07)  | 72.57 (122.12) | 43.5 (105.65)  | 0.819   |
| Placebo-group                                         | 149.12 (85.4) | 134.12 (88.61) | 93.88 (100.54) | 0.473   |
| P value                                               | 0.025         | 0.280          | 0.320          |         |
